# Supplementary material for: Auto-Tandem Catalysis in Ionic Liquids: Synthesis of 2-Oxazolidinones by Palladium-Catalyzed Oxidative Carbonylation of Propargylic Amines in EmimEtSO4
Source: PubMed Central journal article supplement (PMC6273147; doi:10.3390/molecules21070897), 2016-07-08
Supplement: molecules-21-00897-s001.pdf [file molecules-21-00897-s001.pdf]

# Supplementary Materials: Auto-Tandem Catalysis in Ionic Liquids: Synthesis of 2-Oxazolidinones by Palladium-Catalyzed Oxidative Carbonylation of Propargylic Amines in EmimEtSO<sub>4</sub>

Raffaella Mancuso, Asif Maner, Ida Ziccarelli, Christian Pomelli, Cinzia Chiappe, Nicola Della Ca', Lucia Veltri, and Bartolo Gabriele

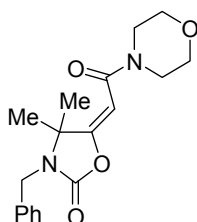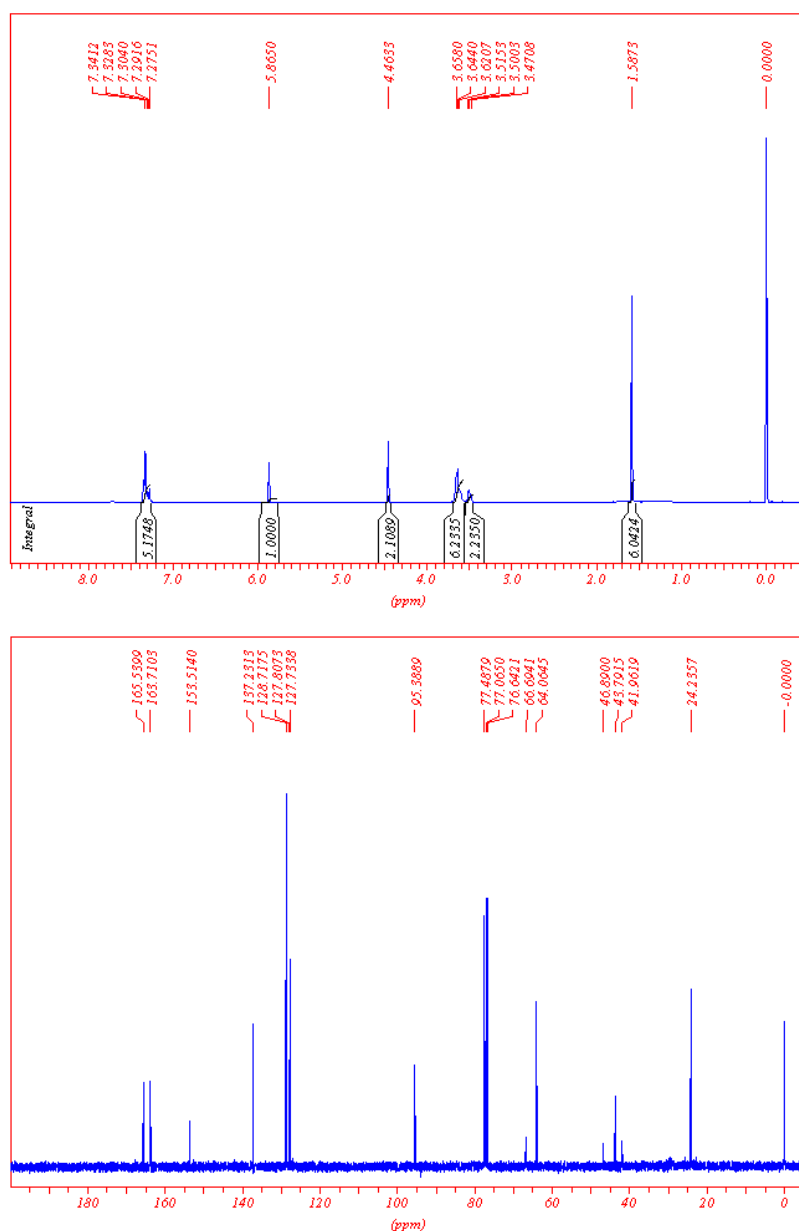

**Figure S1.** (E)-3-Benzyl-4,4-dimethyl-5-(2-morpholin-4-yl-2-oxoethylidene)oxazolidin-2-one (3aa-E). Top: <sup>1</sup>H-NMR (CDCl<sub>3</sub>); bottom: <sup>13</sup>C-NMR (CDCl<sub>3</sub>).

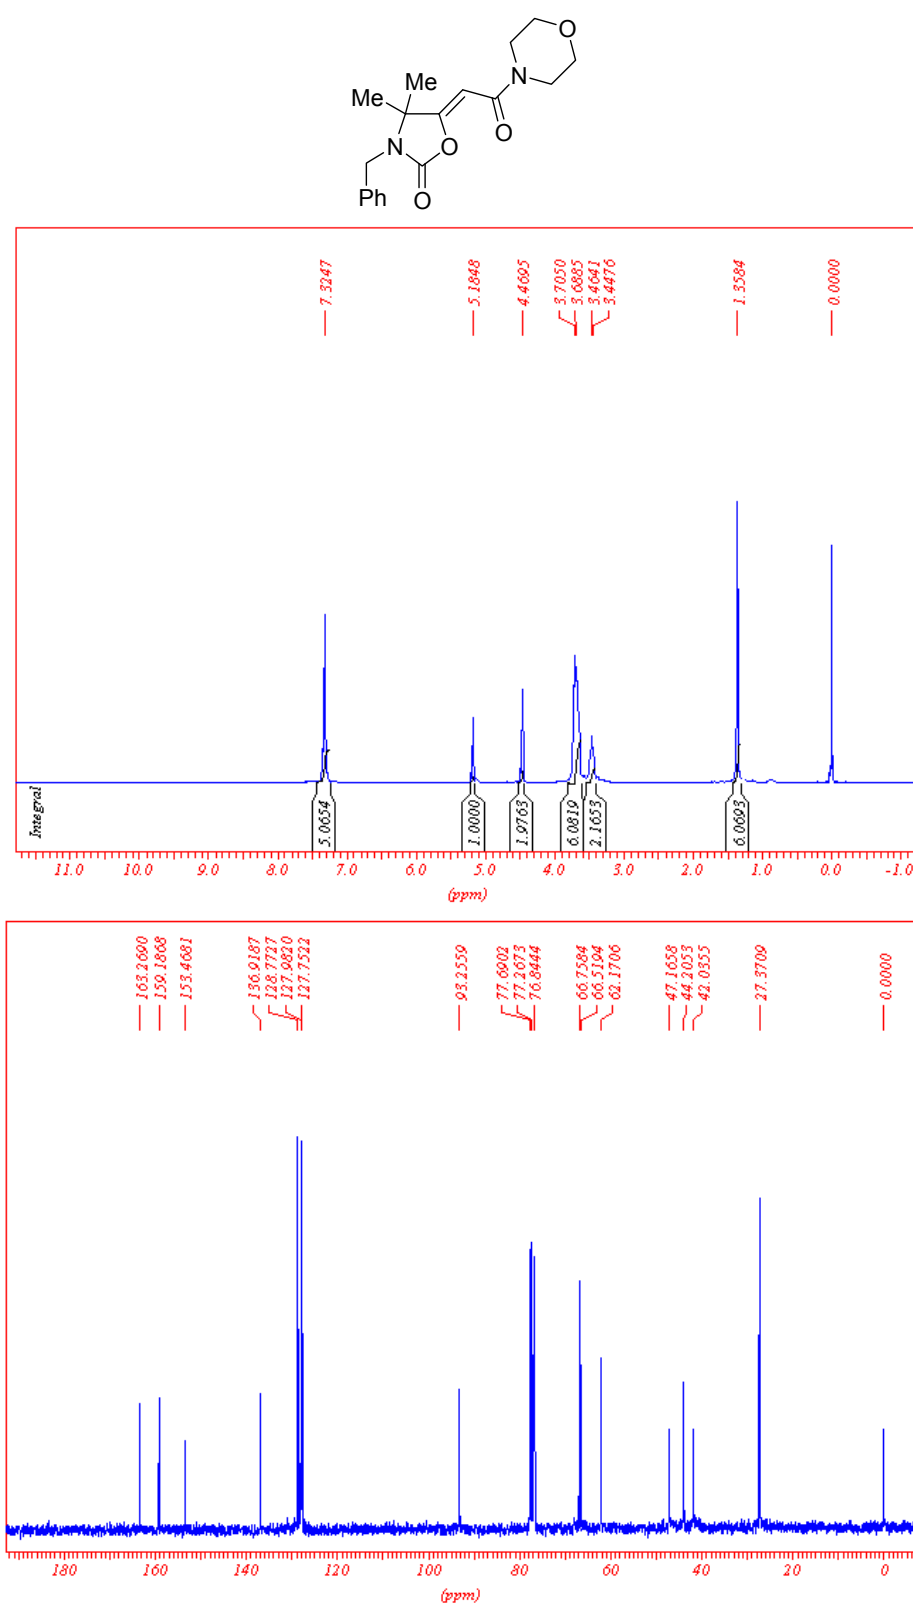

Figure S2. (Z)-3-Benzyl-4,4-dimethyl-5-(2-morpholin-4-yl-2-oxoethylidene)oxazolidin-2-one (3aa-Z).

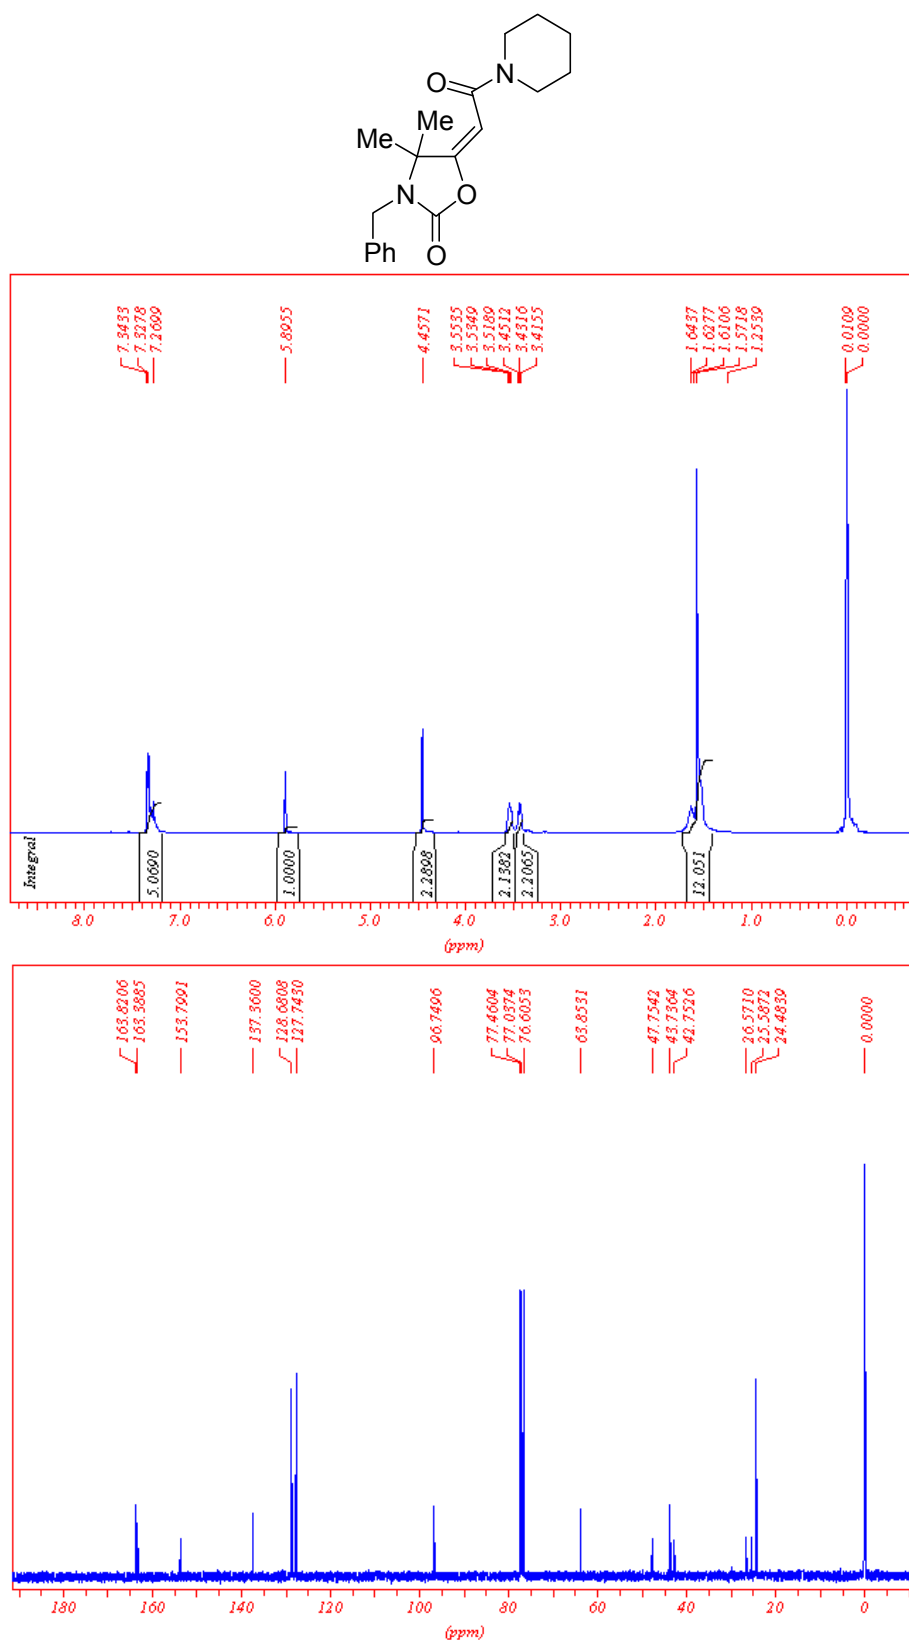

Figure S3. (E)-3-Benzyl-4,4-dimethyl-5-(2-oxo-2-piperidin-1-ylethylidene)oxazolidin-2-one (3ab-E).

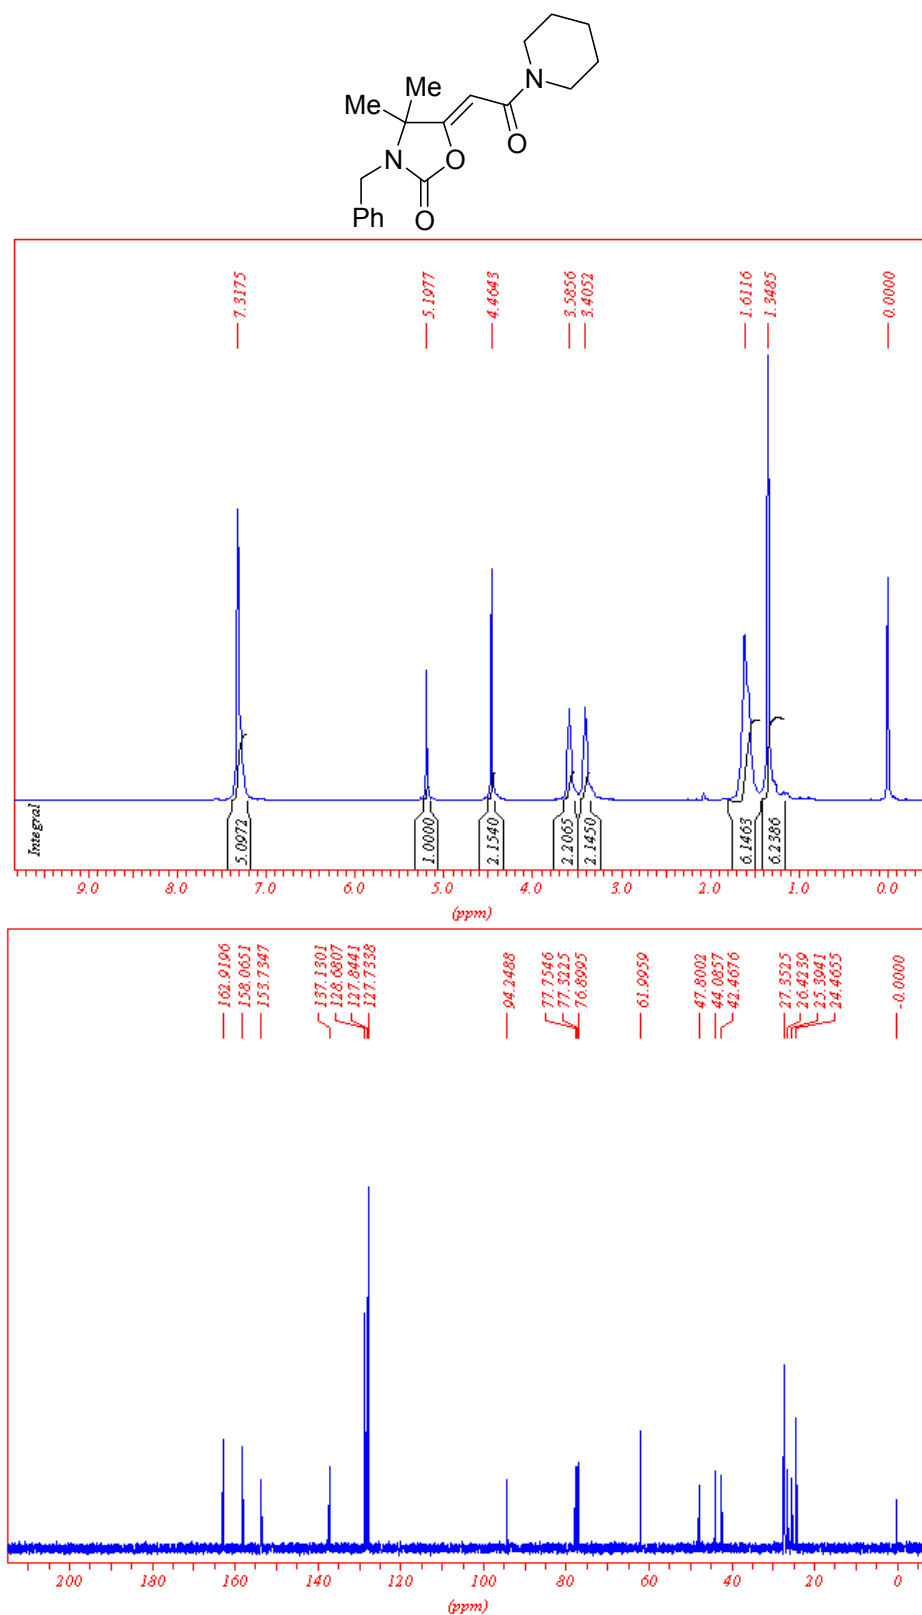

Figure S4. (Z)-3-Benzyl-4,4-dimethyl-5-(2-oxo-2-piperidin-1-ylethylidene)oxazolidin-2-one (3ab-Z).

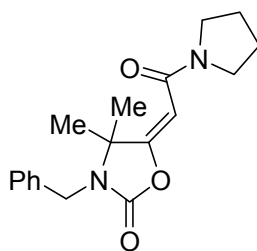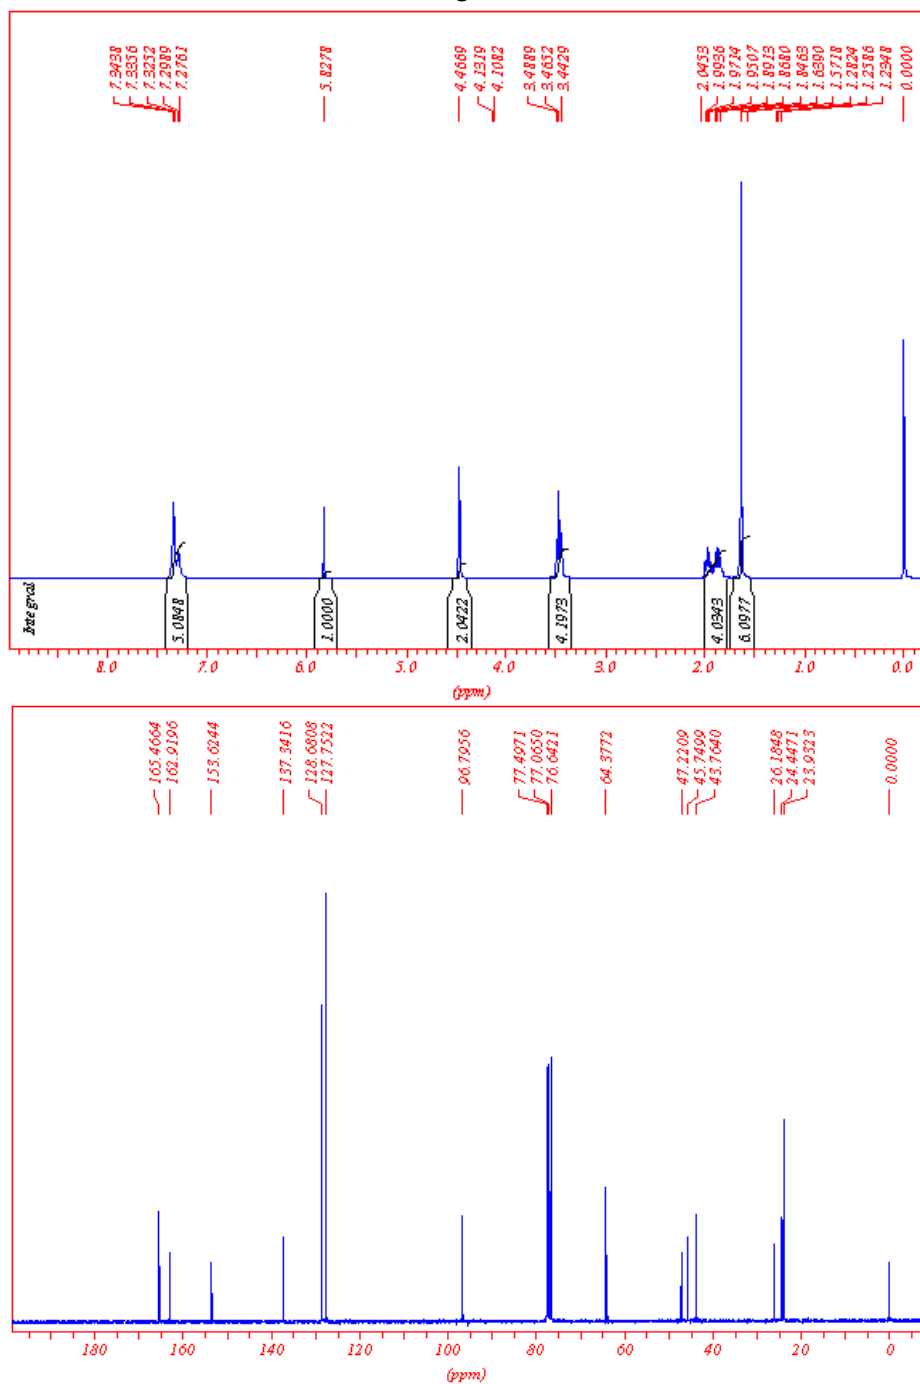

Figure S5 (*E*)-3-Benzyl-4,4-dimethyl-5-(2-oxo-2-pyrrolidin-1-ylethylidene)oxazolidin-2-one (**3ac-E**).

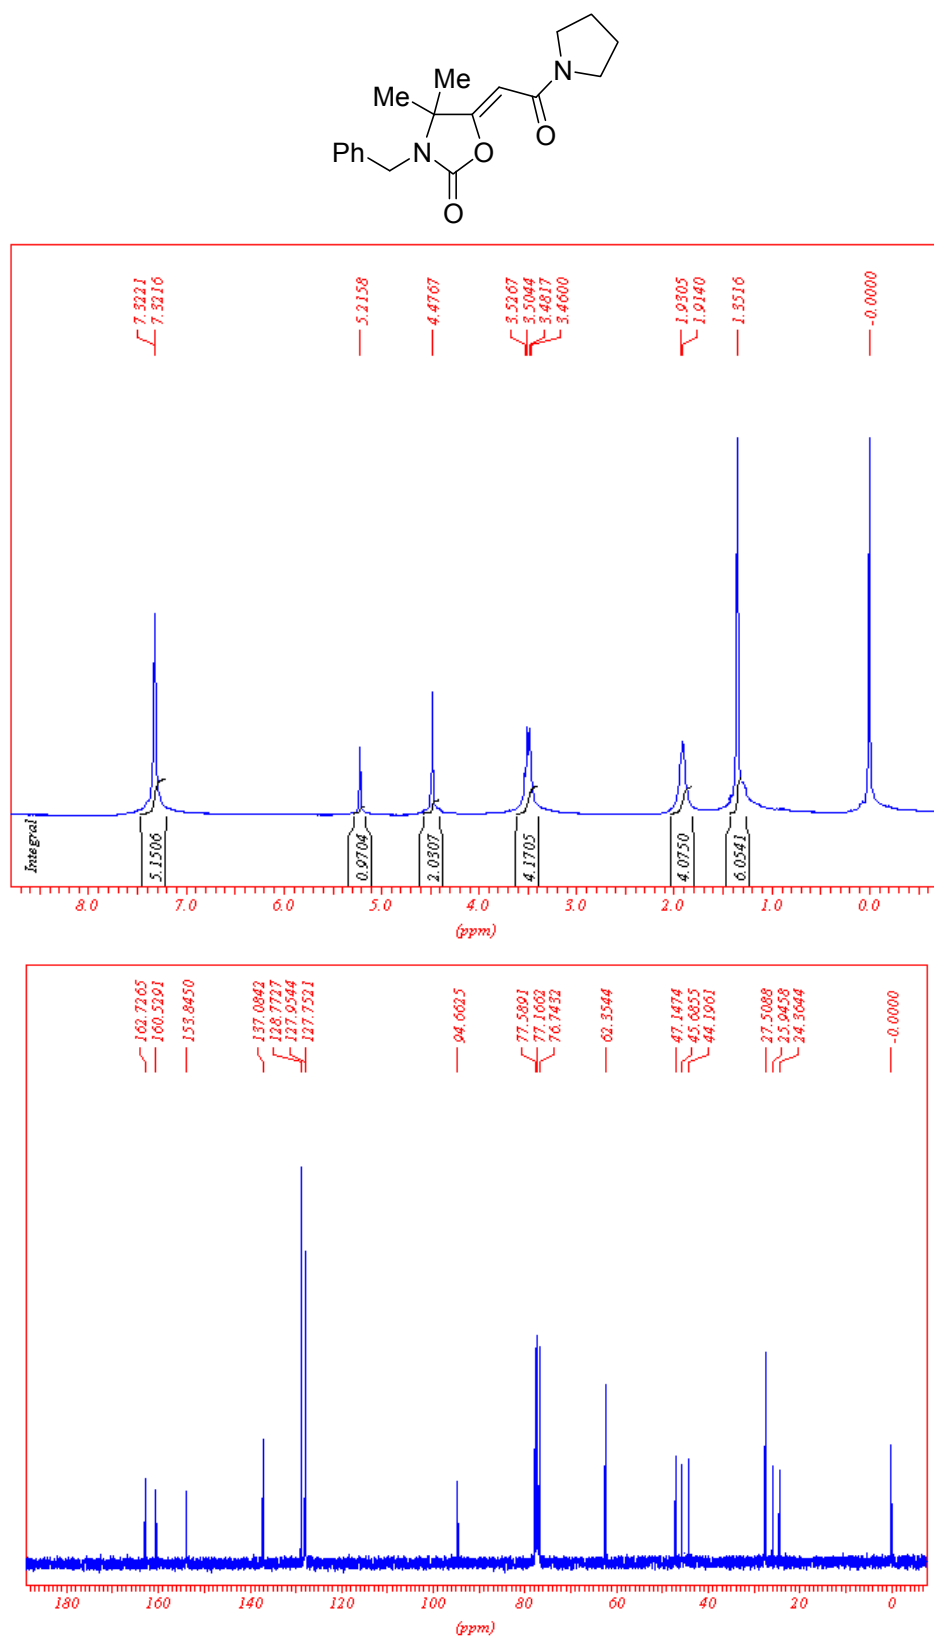

Figure S6. (Z)-3-Benzyl-4,4-dimethyl-5-(2-oxo-2-pyrrolidin-1-ylethylidene)oxazolidin-2-one (3ac-Z).

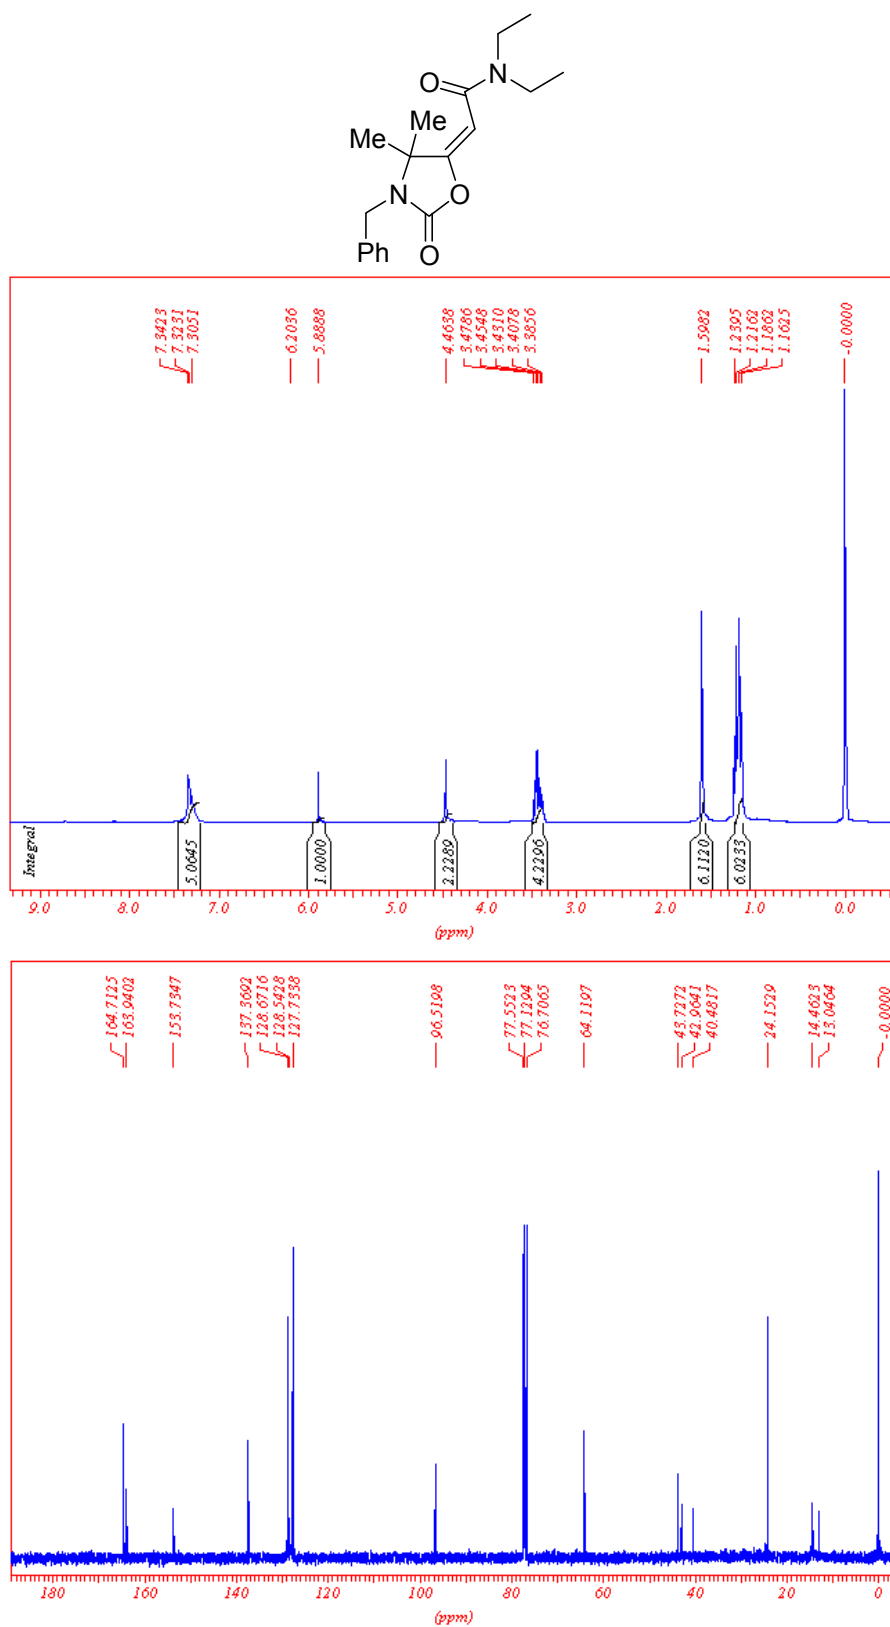

Figure S7. (E)-2-(3-Benzyl-4,4-dimethyl-2-oxo-oxazolidin-5-ylidene)-N,N-diethylacetamide (3ad-E).

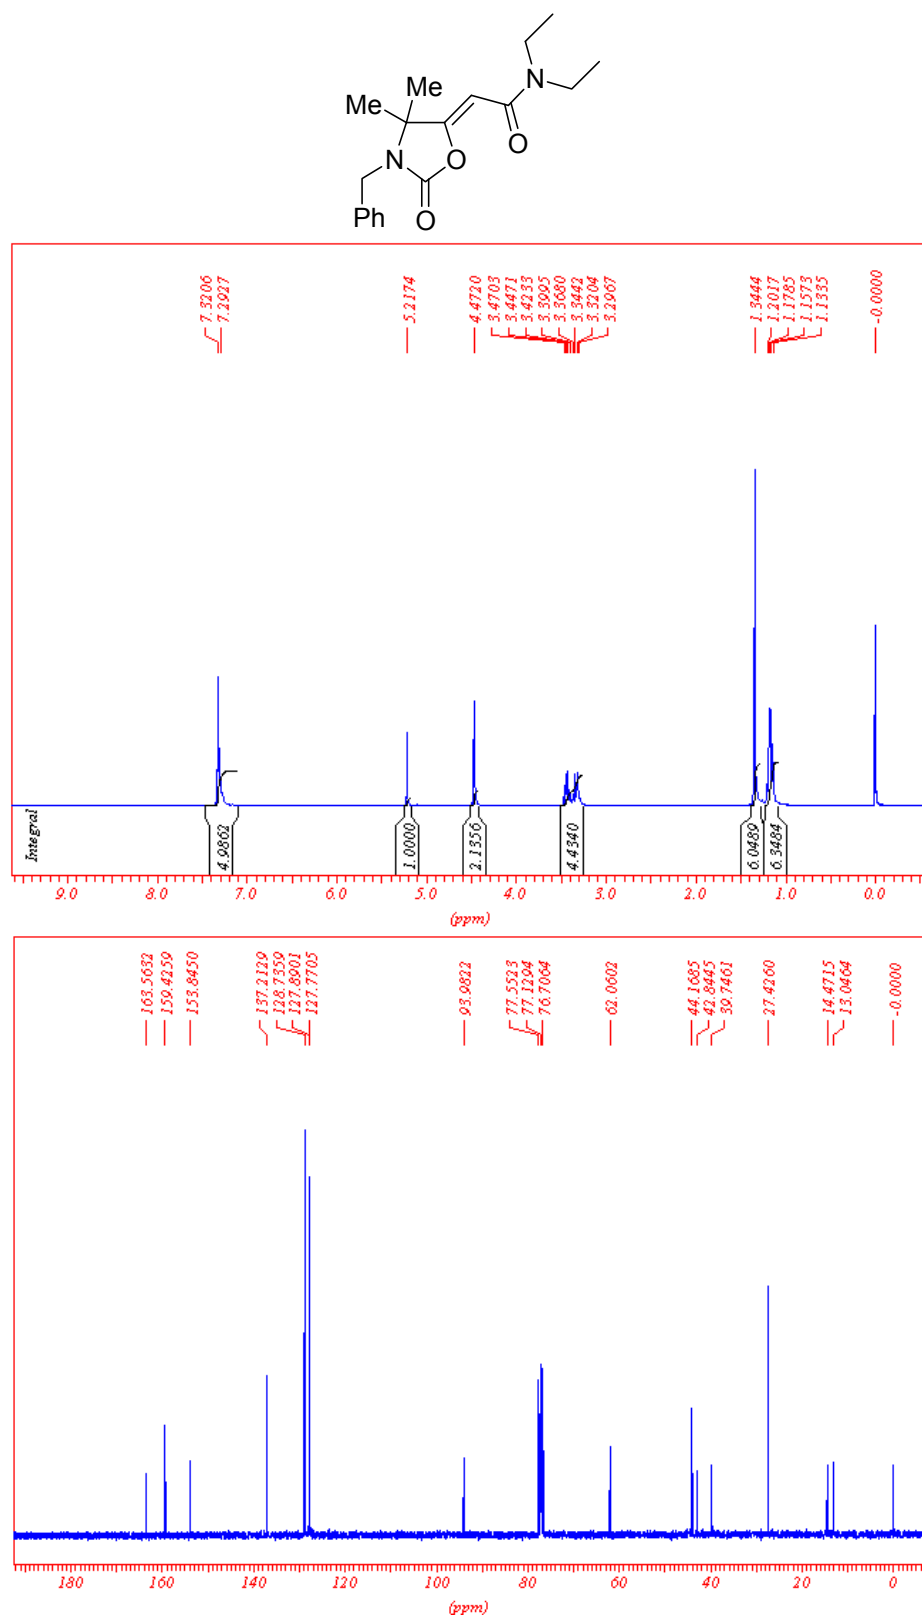

Figure S8. (Z)-2-(3-Benzyl-4,4-dimethyl-2-oxo-oxazolidin-5-ylidene)-N,N-diethylacetamide (3ad-Z).



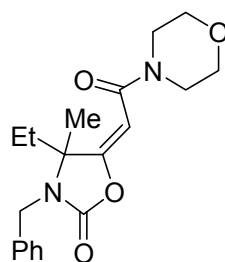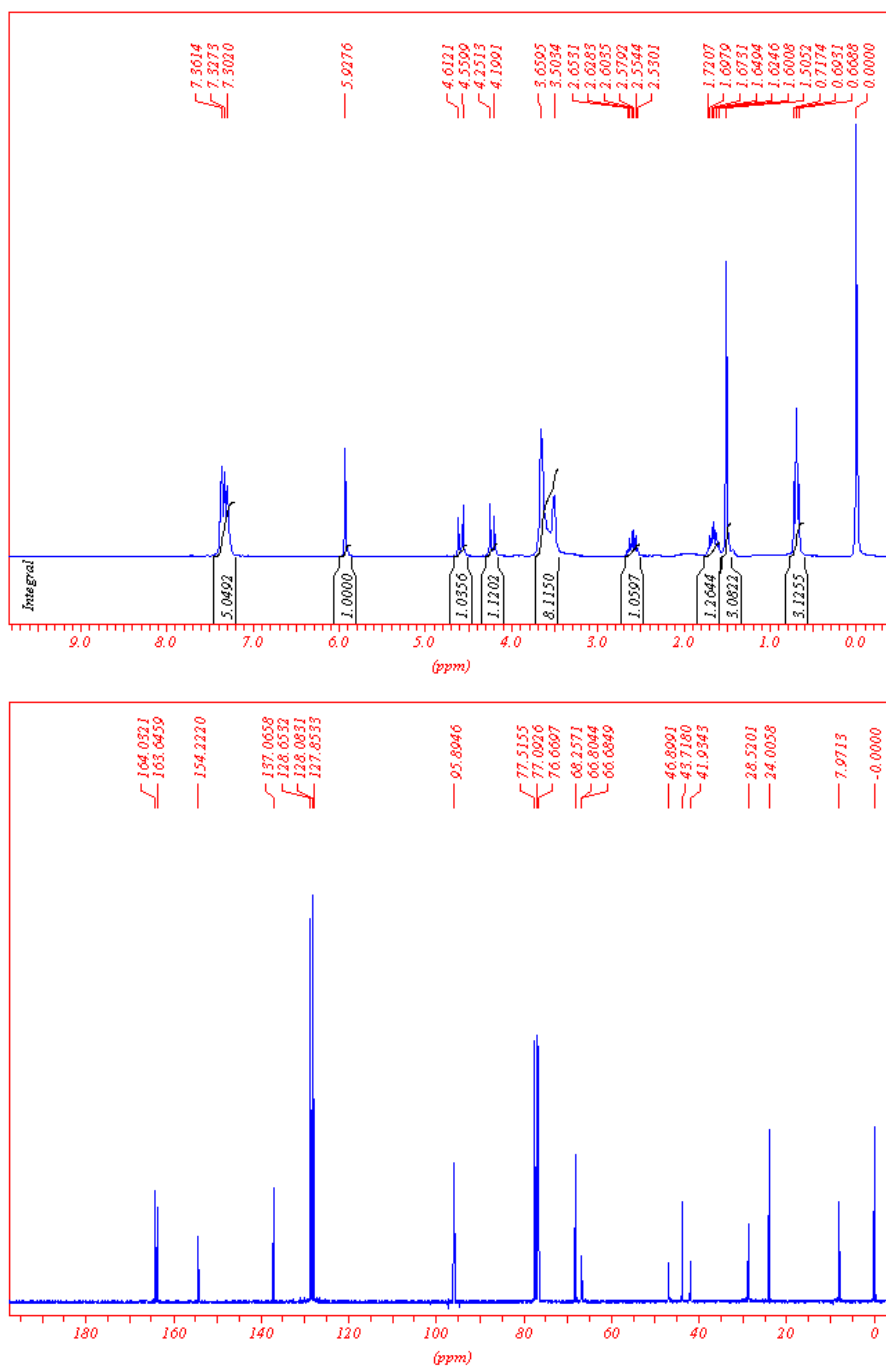

Figure S9. (*E*)-3-Benzyl-4-ethyl-4-methyl-5-(2-morpholin-4-yl-2-oxoethylidene)oxazolidin-2-one (**3ba-E**).

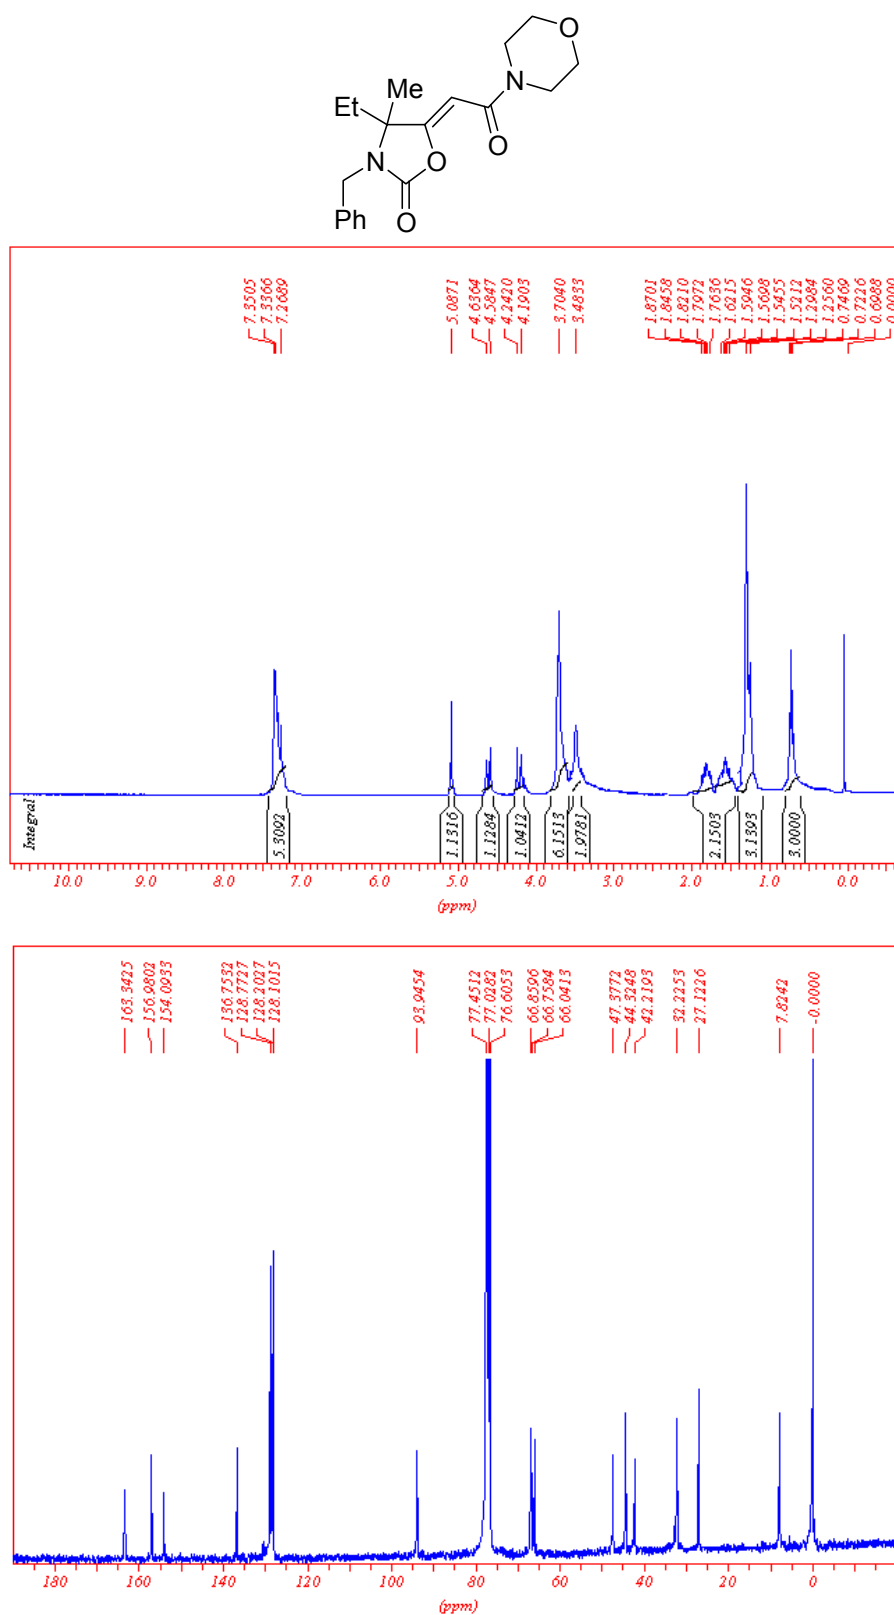

Figure S10. (Z)-3-Benzyl-4-ethyl-4-methyl-5-(2-morpholin-4-yl-2-oxoethylidene)oxazolidin-2-one (3ba-Z).

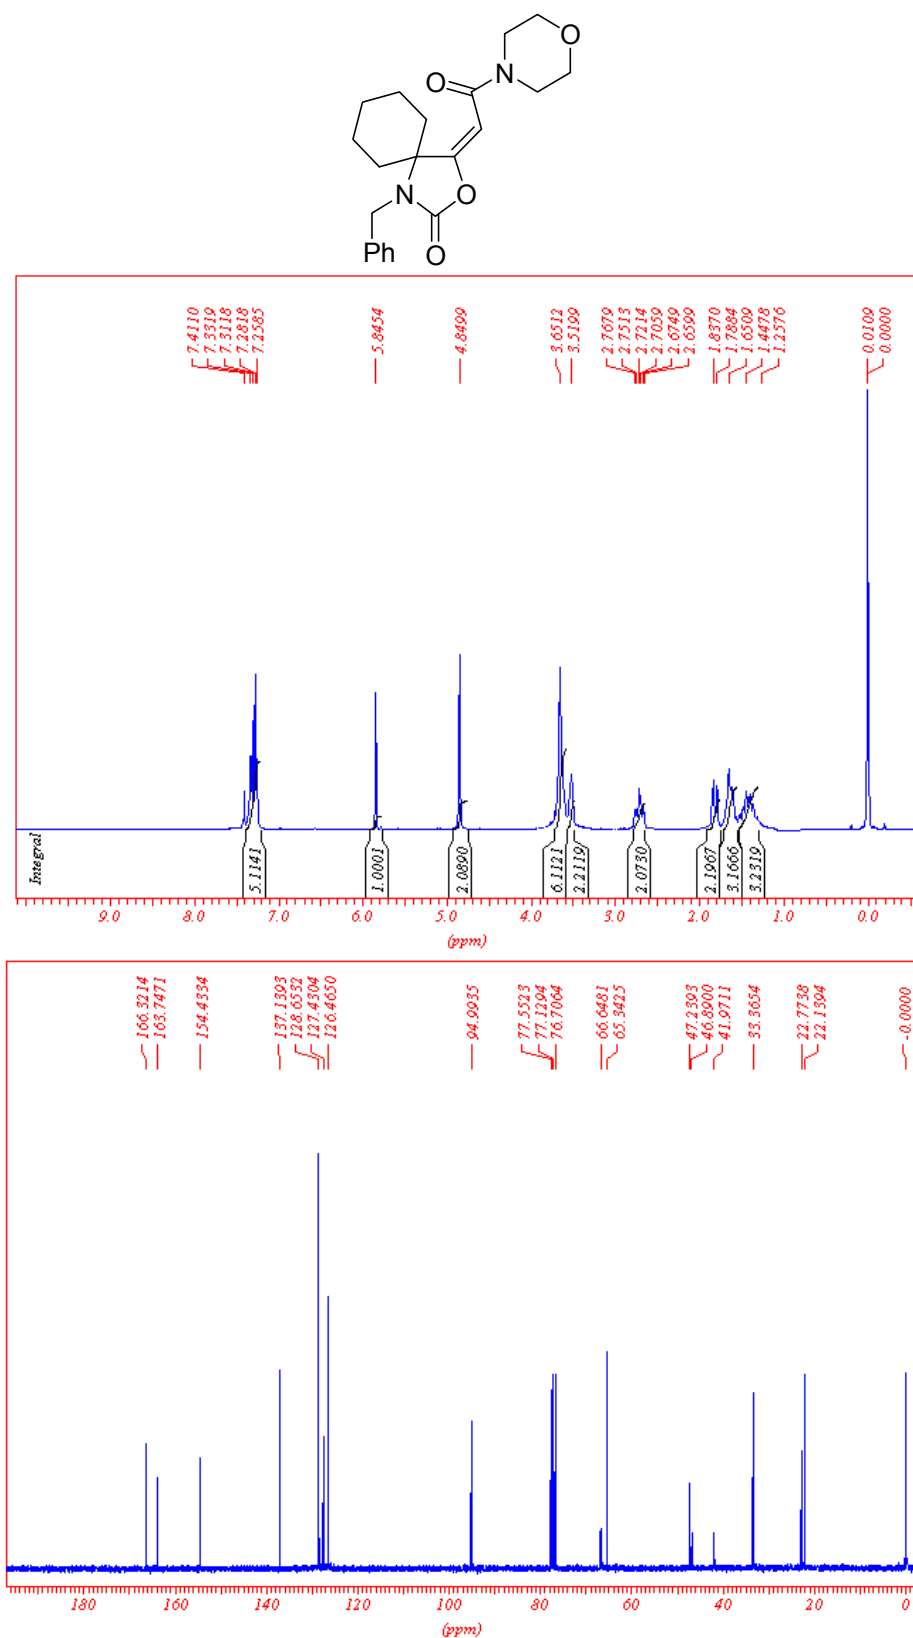

Figure S11. (E)-1-Benzyl-4-(2-morpholin-4-yl-2-oxoethylidene)-3-oxa-1-azaspiro[4.5]decan-2-one (3ca-E).

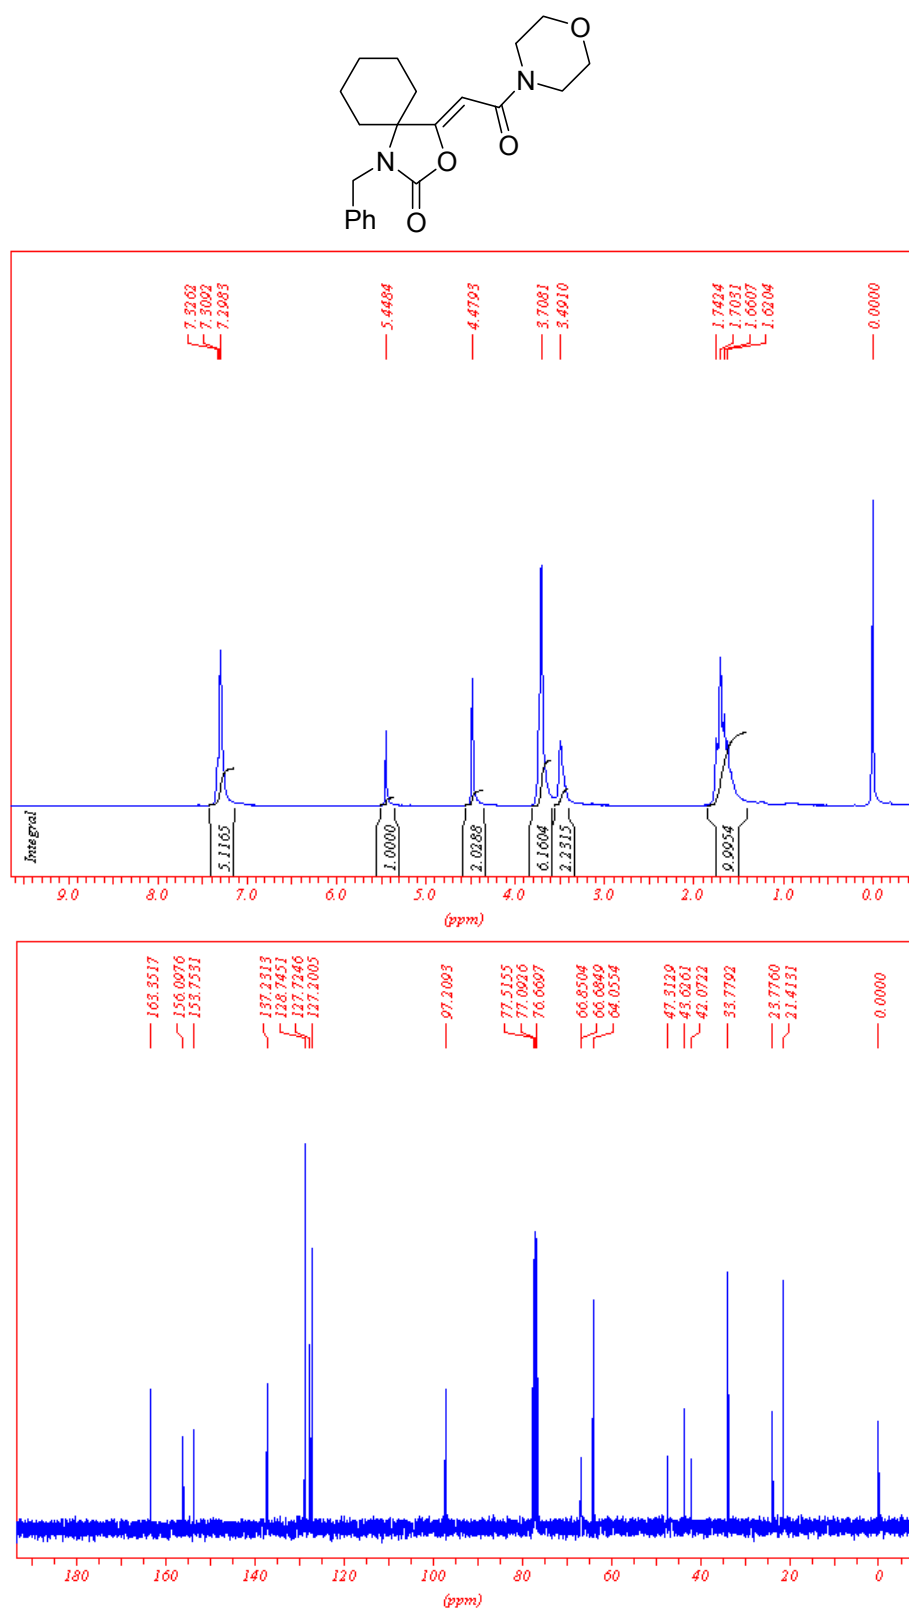

Figure S12. (Z)-1-Benzyl-4-(2-morpholin-4-yl-2-oxoethylidene)-3-oxa-1-azaspiro[4.5]decan-2-one (3ca-Z).

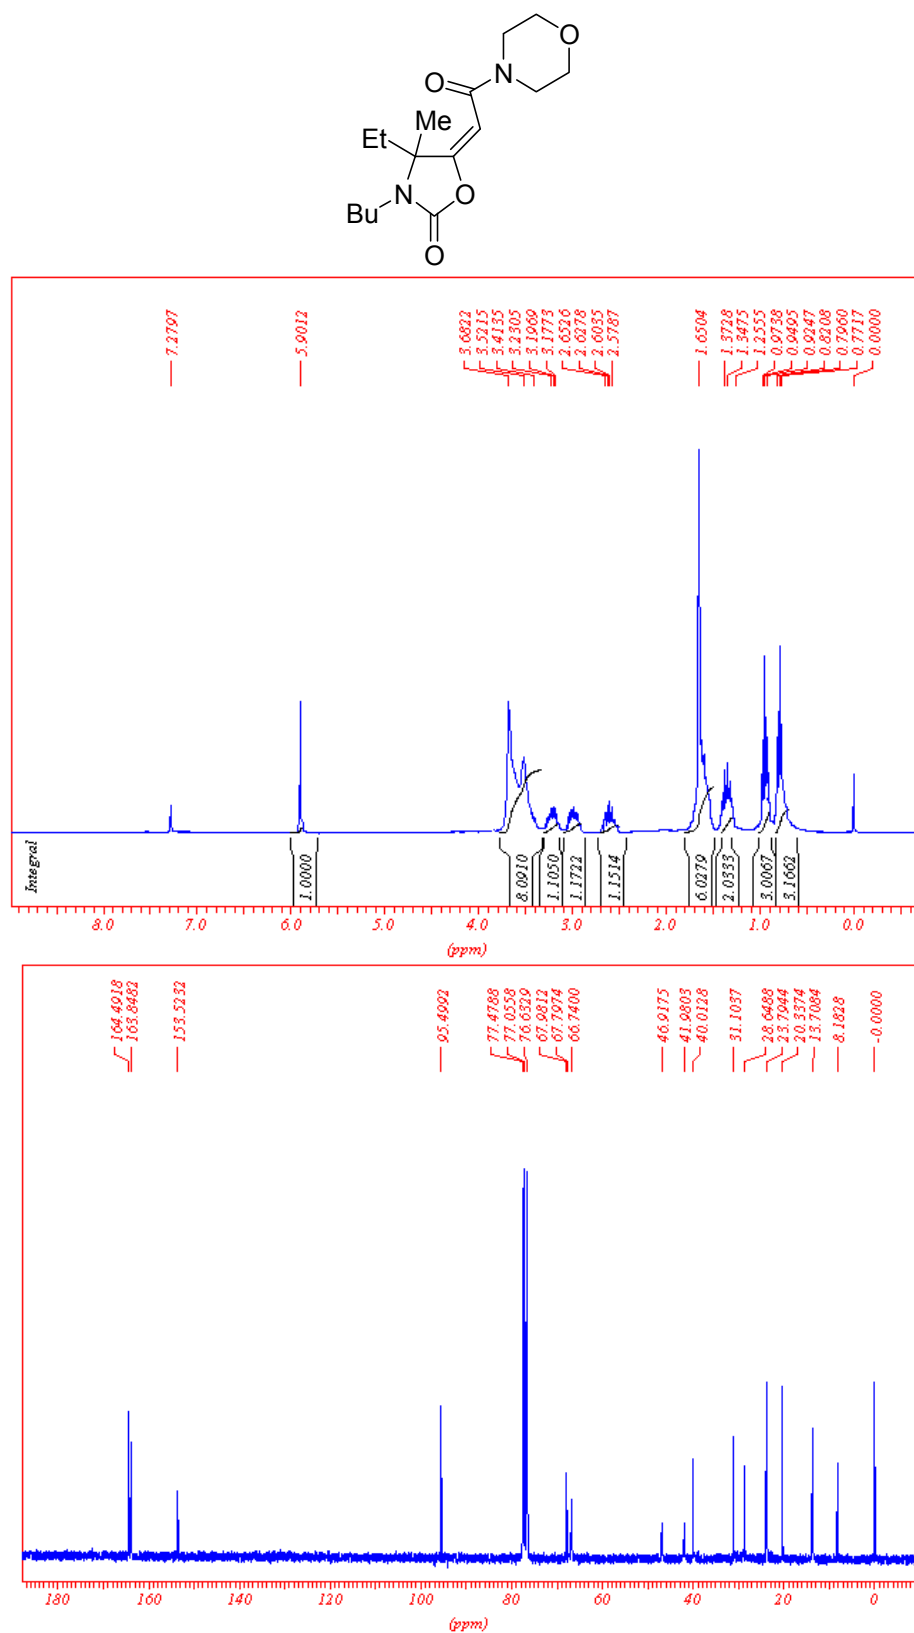

Figure S13. (E)-3-Butyl-4-ethyl-4-methyl-5-(2-morpholin-4-yl-2-oxoethylidene)oxazolidin-2-one (3da-E).

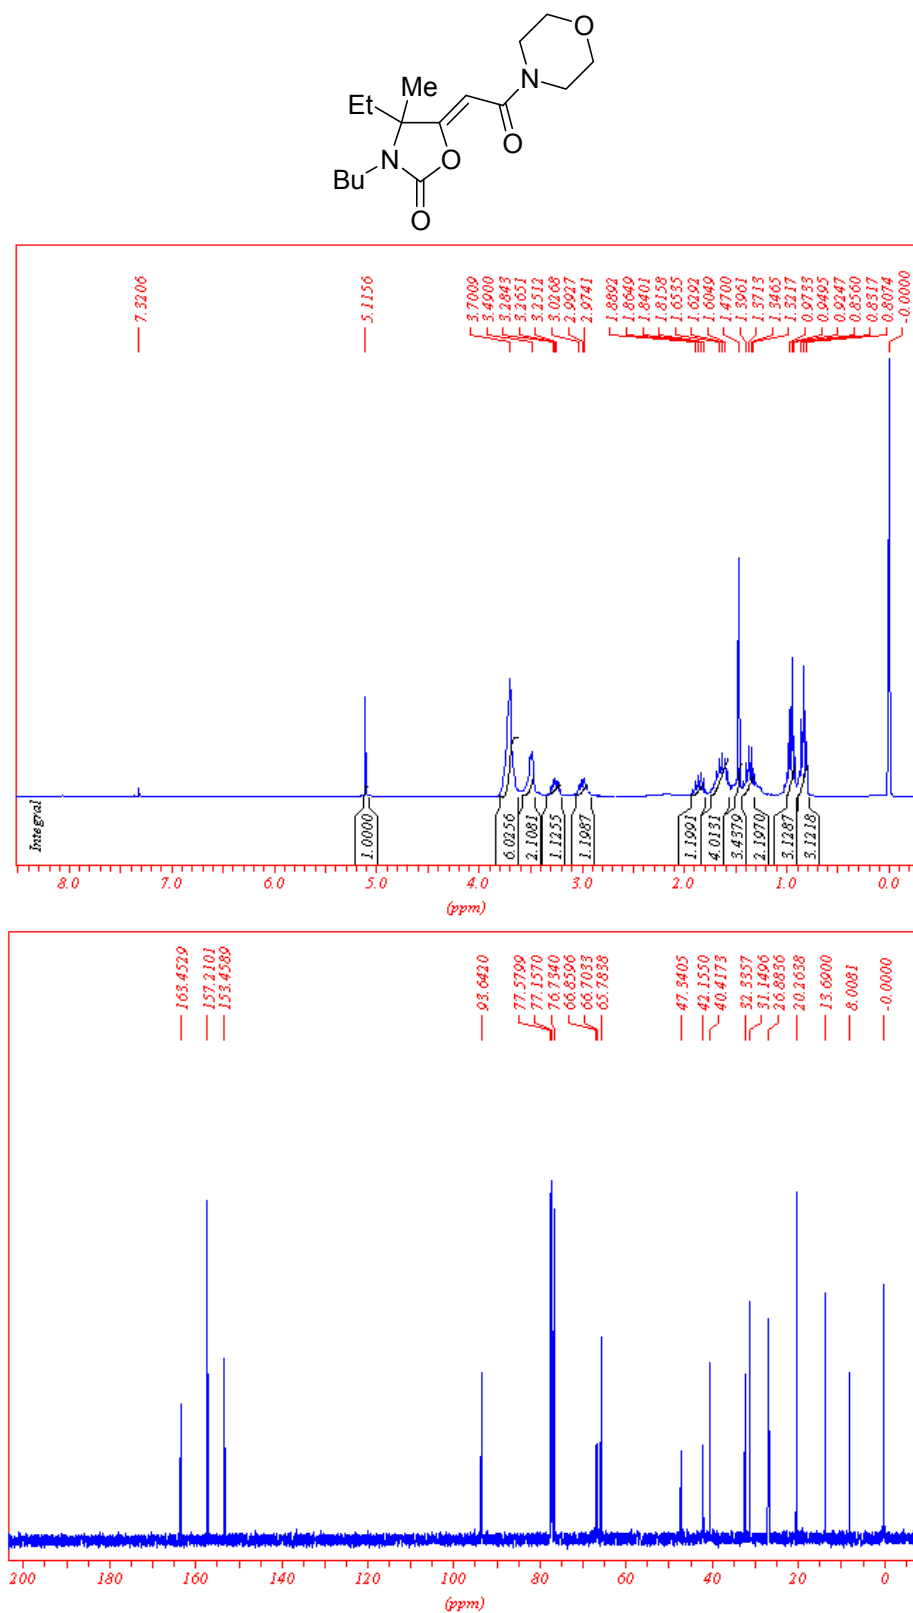

Figure S14. (Z)-3-Butyl-4-ethyl-4-methyl-5-(2-morpholin-4-yl-2-oxoethylidene)oxazolidin-2-one (3da-Z).

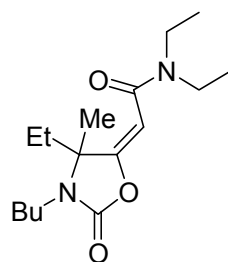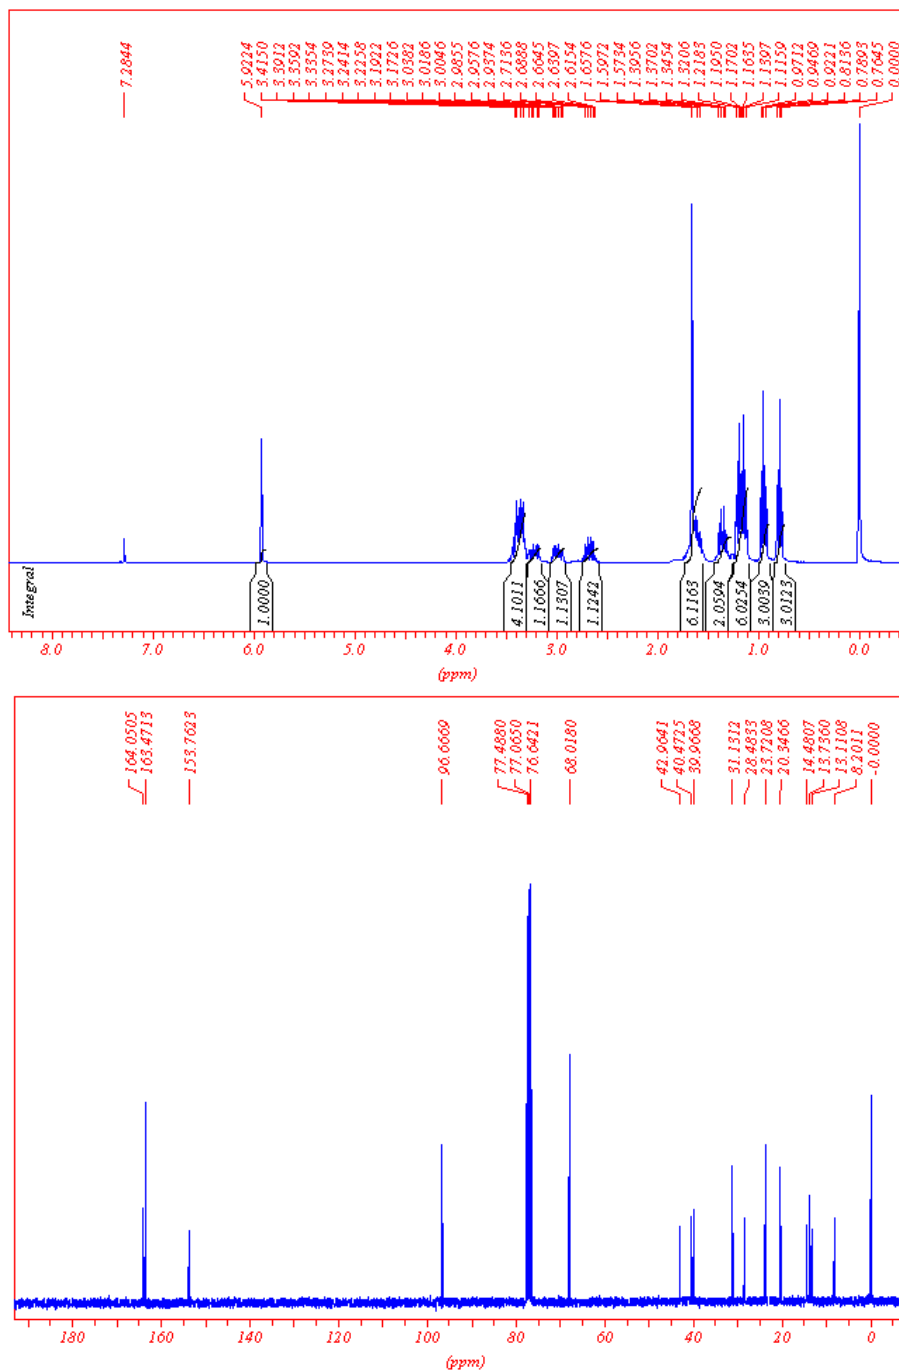

Figure S15. (E)-2-(3-Butyl-4-ethyl-4-methyl-2-oxo-oxazolidin-5-ylidene)-N,N-diethylacetamide (3dd-E).

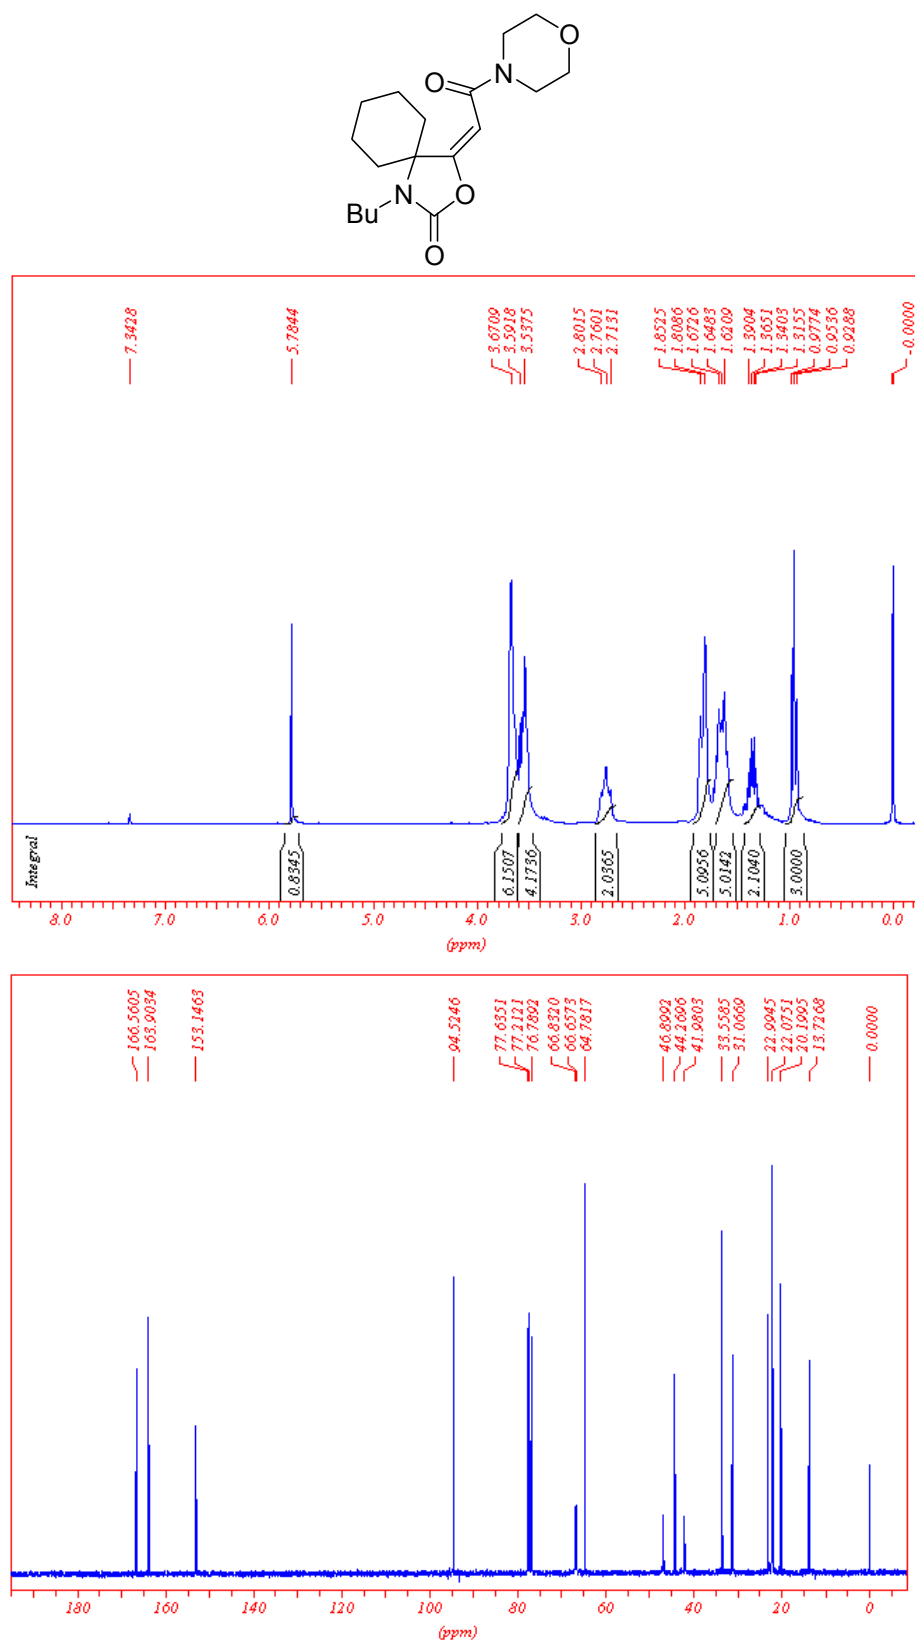

Figure S16. (E)-1-Butyl-4-(2-morpholin-4-yl-2-oxoethylidene)-3-oxa-1-azaspiro[4.5]decan-2-one (3ea-E).



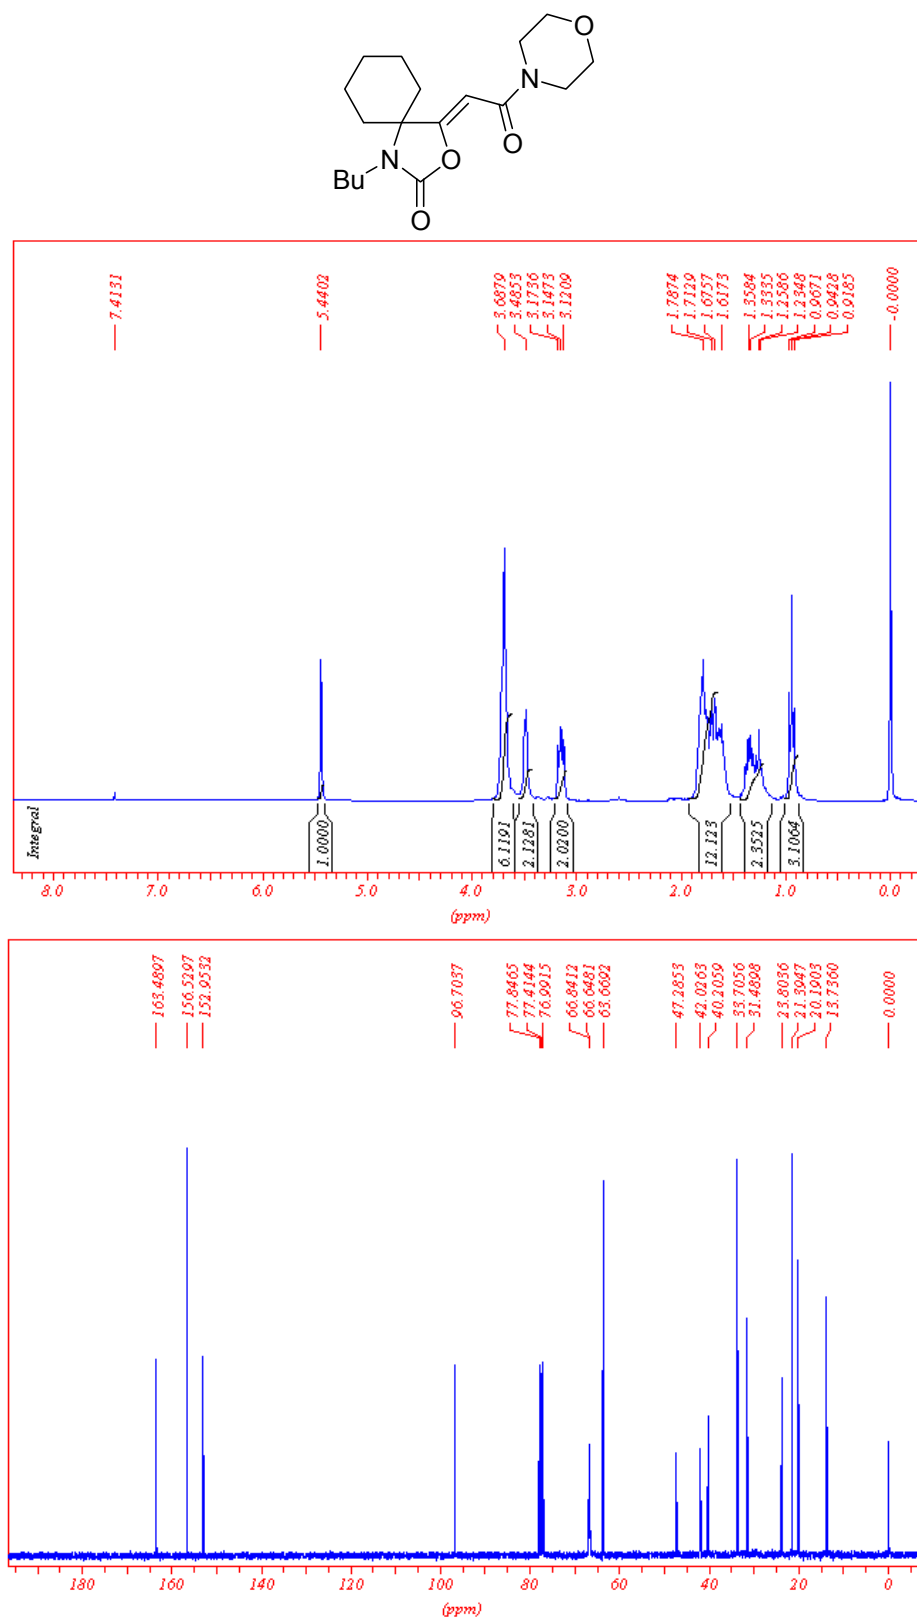

Figure S17. (Z)-1-Butyl-4-(2-morpholin-4-yl-2-oxoethylidene)-3-oxa-1-azaspiro[4.5]decan-2-one (3ea-Z).
